# Supplementary material for: The Neuroprotective Marine Compound Psammaplysene A Binds the RNA-Binding Protein HNRNPK
Source: Mar Drugs. 2017 Aug 7;15(8):246. doi: 10.3390/md15080246 (PMC5577601; doi:10.3390/md15080246)
Supplement: Supplementary file 1 [file marinedrugs-15-00246-s001.zip › marinedrugs-211484-supplementary.xlsx]

## Sheet: Samples Report Combined
	Search Engine Set: 1 Search Engine
	Search Engine: Mascot
	Version: 2.4.0
	Samples: All Samples
	Fragment Tolerance: 0.80 Da (Monoisotopic)
	Parent Tolerance: 50 PPM (Monoisotopic)
	Fixed Modifications: +57 on C (Carbamidomethyl)
	Variable Modifications: +16 on M (Oxidation)
	Database: the US_human_CanIsoCon20120228 database (unknown version, 140844 entries)
	Digestion Enzyme: SemiTrypsin
	Max Missed Cleavages: 2
	Scaffold Version: Scaffold_3.6.2
	Peptide Thresholds: 90.0% minimum
	Protein Thresholds: 90.0% minimum and 1 peptides minimum
				Number of Assigned Spectra						Number of Unique Peptides						Percent Coverage
				PA-FG Beads			2B On Bead			PA-FG Beads			2B On Bead			PA-FG Beads			2B On Bead
#	Identified Proteins (212)	Accession Number	Molecular Weight	top band	middle band	bottom band	in solution			top band	middle band	bottom band	in solution			top band	middle band	bottom band	in solution
1	ATP-dependent RNA helicase DDX3X OS=Homo sapiens GN=DDX3X PE=1 SV=3	O00571	73 kDa	16	658	42	0			9	50	16	0			0.17	0.6	0.34	0
2	Trypsin precursor - Sus scrofa	CON_P00761	24 kDa	106	50	36	0			11	10	6	0			0.25	0.25	0.25	0
3	Heterogeneous nuclear ribonucleoprotein Q OS=Homo sapiens GN=SYNCRIP PE=1 SV=2	O60506	70 kDa	1	73	266	0			1	23	34	0			0.019	0.48	0.54	0
4	KH domain-containing, RNA-binding, signal transduction-associated protein 1 OS=Homo sapiens GN=KHDRBS1 PE=1 SV=1	Q07666	48 kDa	2	16	248	0			2	5	28	0			0.063	0.13	0.44	0
5	Keratin, type II cytoskeletal 1 OS=Homo sapiens GN=KRT1 PE=1 SV=6	P04264	66 kDa	36	23	54	62			14	13	21	13			0.24	0.23	0.38	0.28
6	Heterogeneous nuclear ribonucleoprotein K OS=Homo sapiens GN=HNRNPK PE=1 SV=1	P61978	51 kDa	5	9	149	5			3	4	26	3			0.1	0.14	0.6	0.11
7	Myosin-10 OS=Homo sapiens GN=MYH10 PE=1 SV=3	P35580	229 kDa	153	22	11	0			65	9	6	0			0.37	0.071	0.052	0
8	PABPC4 protein OS=Homo sapiens GN=PABPC4 PE=2 SV=1	Q4VC03	72 kDa	0	159	20	0			0	35	7	0			0	0.4	0.17	0
9	La-related protein 1 OS=Homo sapiens GN=LARP1 PE=1 SV=2	Q6PKG0	124 kDa	144	2	0	0			44	1	0	0			0.49	0.015	0	0
10	Keratin, type I cytoskeletal 9 - Homo sapiens (Human)	CON_P35527	62 kDa	17	13	52	41			10	7	15	16			0.29	0.23	0.41	0.37
11	Myosin-9 OS=Homo sapiens GN=MYH9 PE=1 SV=4	P35579	227 kDa	109	10	9	0			48	6	5	0			0.39	0.064	0.066	0
12	Keratin, type I cytoskeletal 10 - Homo sapiens (Human)	CON_P13645	60 kDa	32	15	16	12			14	8	8	7			0.28	0.14	0.16	0.19
13	Heterogeneous nuclear ribonucleoprotein M OS=Homo sapiens GN=HNRNPM PE=1 SV=3	P52272	78 kDa	0	121	4	0			0	24	3	0			0	0.45	0.067	0
14	Probable ATP-dependent RNA helicase DDX5 OS=Homo sapiens GN=DDX5 PE=1 SV=1	P17844	69 kDa	0	19	84	0			0	7	24	0			0	0.17	0.43	0
15	Heterogeneous nuclear ribonucleoprotein R OS=Homo sapiens GN=HNRNPR PE=1 SV=1	O43390	71 kDa	0	60	59	0			0	19	16	0			0	0.39	0.38	0
16	Myb-binding protein 1A OS=Homo sapiens GN=MYBBP1A PE=1 SV=2	Q9BQG0	149 kDa	94	0	0	0			37	0	0	0			0.36	0	0	0
17	ATP-dependent RNA helicase A OS=Homo sapiens GN=DHX9 PE=1 SV=4	Q08211	141 kDa	49	10	3	0			22	3	2	0			0.23	0.035	0.026	0
18	Pentatricopeptide repeat-containing protein 3, mitochondrial OS=Homo sapiens GN=PTCD3 PE=1 SV=3	Q96EY7	79 kDa	0	92	0	0			0	22	0	0			0	0.46	0	0
19	Polyadenylate-binding protein 1 OS=Homo sapiens GN=PABPC1 PE=1 SV=2	P11940	71 kDa	0	81	12	1			0	20	6	1			0	0.51	0.25	0.025
20	RNA-binding protein 14 OS=Homo sapiens GN=RBM14 PE=1 SV=2	Q96PK6	69 kDa	0	70	6	9			0	26	3	5			0	0.41	0.082	0.088
21	Keratin, type II cytoskeletal 2 epidermal OS=Homo sapiens GN=KRT2 PE=1 SV=2	P35908	65 kDa	15	3	22	3			8	2	14	3			0.19	0.067	0.33	0.086
22	Probable ATP-dependent RNA helicase YTHDC2 OS=Homo sapiens GN=YTHDC2 PE=1 SV=2	Q9H6S0	160 kDa	81	0	0	0			36	0	0	0			0.36	0	0	0
23	Insulin-like growth factor 2 mRNA-binding protein 1 OS=Homo sapiens GN=IGF2BP1 PE=1 SV=2	Q9NZI8	63 kDa	0	8	49	0			0	5	16	0			0	0.11	0.38	0
24	Sorting nexin-9 OS=Homo sapiens GN=SNX9 PE=1 SV=1	Q9Y5X1	67 kDa	0	63	0	0			0	23	0	0			0	0.5	0	0
25	DEAD (Asp-Glu-Ala-Asp) box polypeptide 17 (Fragment) OS=Homo sapiens GN=DDX17 PE=2 SV=1	Q59F66	81 kDa	0	23	8	0			0	14	6	0			0	0.31	0.2	0
26	Zinc finger protein 326 OS=Homo sapiens GN=ZNF326 PE=4 SV=1	A8MYX1	66 kDa	0	57	0	0			0	21	0	0			0	0.45	0	0
27	Serum albumin precursor - Bos taurus (Bovine)	CON_P02769	69 kDa	6	4	11	0			4	2	7	0			0.079	0.043	0.16	0
28	Heterogeneous nuclear ribonucleoprotein L OS=Homo sapiens GN=HNRNPL PE=1 SV=2	P14866	64 kDa	0	4	48	0			0	2	13	0			0	0.041	0.41	0
29	Insulin receptor substrate 4 OS=Homo sapiens GN=IRS4 PE=1 SV=1	O14654	134 kDa	49	0	0	0			20	0	0	0			0.23	0	0	0
30	La-related protein 7 OS=Homo sapiens GN=LARP7 PE=1 SV=1	Q4G0J3	67 kDa	0	50	0	0			0	17	0	0			0	0.34	0	0
31	TAF15 RNA polymerase II, TATA box binding protein (TBP)-associated factor, 68kDa OS=Homo sapiens GN=TAF15 PE=2 SV=2	Q86X94	62 kDa	0	30	2	0			0	7	1	0			0	0.22	0.024	0
32	Trifunctional enzyme subunit alpha, mitochondrial OS=Homo sapiens GN=HADHA PE=1 SV=2	P40939	83 kDa	0	44	0	0			0	19	0	0			0	0.37	0	0
33	Protein transport protein Sec16A OS=Homo sapiens GN=SEC16A PE=1 SV=3	O15027	234 kDa	37	0	0	0			22	0	0	0			0.17	0	0	0
34	Heterogeneous nuclear ribonucleoprotein U OS=Homo sapiens GN=HNRNPU PE=1 SV=6	Q00839	91 kDa	3	20	4	0			2	11	1	0			0.041	0.16	0.018	0
35	Desmoglein-2 OS=Homo sapiens GN=DSG2 PE=1 SV=2	Q14126	122 kDa	37	0	0	0			15	0	0	0			0.22	0	0	0
36	Heat shock cognate 71 kDa protein OS=Homo sapiens GN=HSPA8 PE=1 SV=1	P11142	71 kDa	0	28	5	0			0	15	3	0			0	0.35	0.057	0
37	Tubulin beta chain OS=Homo sapiens GN=TUBB PE=1 SV=2	P07437	50 kDa	0	2	27	0			0	1	12	0			0	0.059	0.4	0
38	Heterogeneous nuclear ribonucleoprotein U-like protein 1 OS=Homo sapiens GN=HNRNPUL1 PE=1 SV=2	Q9BUJ2	96 kDa	10	10	8	4			6	6	4	3			0.083	0.096	0.069	0.057
39	Putative ATP-dependent RNA helicase DHX57 OS=Homo sapiens GN=DHX57 PE=1 SV=2	Q6P158	156 kDa	29	0	0	0			15	0	0	0			0.15	0	0	0
40	Cytospin-A OS=Homo sapiens GN=SPECC1L PE=1 SV=2	Q69YQ0	125 kDa	26	0	0	0			14	0	0	0			0.15	0	0	0
41	Histone H4 OS=Homo sapiens GN=HIST1H4A PE=1 SV=2	P62805	11 kDa	0	0	0	0			0	0	0	0			0	0	0	0
42	Heat shock 70 kDa protein 1A/1B OS=Homo sapiens GN=HSPA1A PE=1 SV=5	P08107	70 kDa	0	15	13	2			0	10	8	2			0	0.25	0.21	0.048
43	Tetratricopeptide repeat protein 37 OS=Homo sapiens GN=TTC37 PE=1 SV=1	Q6PGP7	175 kDa	29	0	0	0			17	0	0	0			0.15	0	0	0
44	RNA-binding protein FUS OS=Homo sapiens GN=FUS PE=1 SV=1	P35637	53 kDa	0	5	18	8			0	3	5	2			0	0.089	0.16	0.063
45	Tubulin alpha-1B chain OS=Homo sapiens GN=TUBA1B PE=1 SV=1	P68363	50 kDa	1	1	10	9			1	1	5	5			0.04	0.033	0.18	0.17
46	Actin, cytoplasmic 1 OS=Homo sapiens GN=ACTB PE=1 SV=1	P60709	42 kDa	0	0	0	7			0	0	0	5			0	0	0	0.12
47	78 kDa glucose-regulated protein OS=Homo sapiens GN=HSPA5 PE=1 SV=2	P11021	72 kDa	0	29	0	0			0	12	0	0			0	0.28	0	0
48	G protein-binding protein CRFG variant (Fragment) OS=Homo sapiens PE=2 SV=1	Q53GS0	74 kDa	0	27	0	0			0	14	0	0			0	0.29	0	0
49	Stress-70 protein, mitochondrial OS=Homo sapiens GN=HSPA9 PE=1 SV=2	P38646	74 kDa	0	23	0	0			0	11	0	0			0	0.24	0	0
50	Pentatricopeptide repeat domain 1 OS=Homo sapiens GN=PTCD1 PE=2 SV=1	Q3ZB84	79 kDa	0	24	0	0			0	12	0	0			0	0.23	0	0
51	Insulin-like growth factor 2 mRNA-binding protein 3 OS=Homo sapiens GN=IGF2BP3 PE=1 SV=2	O00425	64 kDa	0	10	15	0			0	4	7	0			0	0.12	0.22	0
52	Protein flightless-1 homolog OS=Homo sapiens GN=FLII PE=1 SV=2	Q13045	145 kDa	20	0	0	0			12	0	0	0			0.13	0	0	0
53	RSL1D1 protein (Fragment) OS=Homo sapiens GN=RSL1D1 PE=2 SV=1	Q32Q62	52 kDa	0	0	24	0			0	0	9	0			0	0	0.25	0
54	Myosin phosphatase Rho interacting protein OS=Homo sapiens GN=MPRIP PE=2 SV=1	B9EGI2	118 kDa	19	0	0	0			13	0	0	0			0.19	0	0	0
55	Keratin, type I cytoskeletal 16 OS=Homo sapiens GN=KRT16 PE=1 SV=4	P08779	51 kDa	0	0	0	4			0	0	0	2			0	0	0	0.049
56	Keratin, type II cytoskeletal 6B - Homo sapiens (Human)	CON_P04259	60 kDa	3	2	3	4			2	2	2	2			0.096	0.076	0.092	0.066
57	Vigilin OS=Homo sapiens GN=HDLBP PE=1 SV=2	Q00341	141 kDa	16	0	0	0			10	0	0	0			0.11	0	0	0
58	Protein LYRIC OS=Homo sapiens GN=MTDH PE=1 SV=2	Q86UE4	64 kDa	0	16	0	0			0	8	0	0			0	0.18	0	0
59	Elongation factor 1-alpha 1 OS=Homo sapiens GN=EEF1A1 PE=1 SV=1	P68104	50 kDa	0	0	0	0			0	0	0	0			0	0	0	0
60	Heterogeneous nuclear ribonucleoprotein H OS=Homo sapiens GN=HNRNPH1 PE=1 SV=4	P31943	49 kDa	6	0	6	4			3	0	3	2			0.098	0	0.1	0.065
61	Enolase 1 - Saccharomyces cerevisiae (Baker's yeast)	CON_P00924	47 kDa	0	0	0	0			0	0	0	0			0	0	0	0
62	Isoleucine--tRNA ligase, cytoplasmic OS=Homo sapiens GN=IARS PE=1 SV=2	P41252	145 kDa	14	0	0	0			8	0	0	0			0.078	0	0	0
63	ATP-dependent RNA helicase DDX1 OS=Homo sapiens GN=DDX1 PE=1 SV=2	Q92499	82 kDa	0	15	0	0			0	12	0	0			0	0.24	0	0
64	ATP-binding cassette, sub-family F (GCN20), member 2 OS=Homo sapiens GN=ABCF2 PE=2 SV=1	Q75MJ0	71 kDa	0	14	0	0			0	6	0	0			0	0.12	0	0
65	Far upstream element-binding protein 3 OS=Homo sapiens GN=FUBP3 PE=1 SV=2	Q96I24	62 kDa	0	0	15	0			0	0	8	0			0	0	0.28	0
66	Structural maintenance of chromosomes protein 1A OS=Homo sapiens GN=SMC1A PE=1 SV=2	Q14683	143 kDa	9	0	0	0			6	0	0	0			0.053	0	0	0
67	Splicing factor U2AF 65 kDa subunit OS=Homo sapiens GN=U2AF2 PE=1 SV=4	P26368	54 kDa	0	0	18	0			0	0	6	0			0	0	0.24	0
68	ATPase family AAA domain-containing protein 3A OS=Homo sapiens GN=ATAD3A PE=1 SV=2	Q9NVI7	71 kDa	0	0	18	0			0	0	9	0			0	0	0.18	0
69	Keratin, type II cytoskeletal 5 OS=Homo sapiens GN=KRT5 PE=1 SV=3	P13647	62 kDa	4	0	0	0			2	0	0	0			0.11	0	0	0
70	Lamin-B1 OS=Homo sapiens GN=LMNB1 PE=1 SV=2	P20700	66 kDa	0	0	0	0			0	0	0	0			0	0	0	0
71	Nucleolar protein 58 OS=Homo sapiens GN=NOP58 PE=1 SV=1	Q9Y2X3	60 kDa	0	0	18	0			0	0	9	0			0	0	0.26	0
72	Glyceraldehyde-3-phosphate dehydrogenase OS=Homo sapiens GN=GAPDH PE=1 SV=3	P04406	36 kDa	0	0	0	0			0	0	0	0			0	0	0	0
73	Insulin-like growth factor 2 mRNA-binding protein 2 OS=Homo sapiens GN=IGF2BP2 PE=1 SV=2	Q9Y6M1	66 kDa	0	0	13	0			0	0	7	0			0	0	0.23	0
74	Ig gamma-2 chain C region OS=Homo sapiens GN=IGHG2 PE=1 SV=2	P01859	36 kDa	0	0	0	0			0	0	0	0			0	0	0	0
75	Helicase SKI2W OS=Homo sapiens GN=SKIV2L PE=1 SV=3	Q15477	138 kDa	12	0	0	0			6	0	0	0			0.079	0	0	0
76	TBC1 domain family member 9B OS=Homo sapiens GN=TBC1D9B PE=1 SV=3	Q66K14	141 kDa	8	0	0	0			5	0	0	0			0.055	0	0	0
77	Nitric oxide-associated protein 1 OS=Homo sapiens GN=NOA1 PE=1 SV=2	Q8NC60	78 kDa	0	16	0	0			0	8	0	0			0	0.18	0	0
78	Scaffold attachment factor B2 OS=Homo sapiens GN=SAFB2 PE=1 SV=1	Q14151	107 kDa	7	0	0	0			6	0	0	0			0.09	0	0	0
79	Galectin-3-binding protein OS=Homo sapiens GN=LGALS3BP PE=1 SV=1	Q08380	65 kDa	0	13	0	0			0	7	0	0			0	0.18	0	0
80	Crooked neck-like protein 1 OS=Homo sapiens GN=CRNKL1 PE=1 SV=4	Q9BZJ0	100 kDa	0	10	0	0			0	7	0	0			0	0.1	0	0
81	Histone deacetylase 6 OS=Homo sapiens GN=HDAC6 PE=1 SV=2	Q9UBN7	131 kDa	9	0	0	0			7	0	0	0			0.078	0	0	0
82	Mov10, Moloney leukemia virus 10, homolog (Mouse) OS=Homo sapiens GN=MOV10 PE=2 SV=1	Q5JR04	107 kDa	0	7	0	0			0	3	0	0			0	0.043	0	0
83	Ribonuclease 3 OS=Homo sapiens GN=DROSHA PE=1 SV=2	Q9NRR4	159 kDa	12	0	0	0			7	0	0	0			0.066	0	0	0
84	Eukaryotic translation initiation factor 3 subunit D OS=Homo sapiens GN=EIF3D PE=1 SV=1	O15371	64 kDa	0	0	15	0			0	0	4	0			0	0	0.14	0
85	Histone H2A type 1 OS=Homo sapiens GN=HIST1H2AG PE=1 SV=2	P0C0S8	14 kDa	0	0	0	0			0	0	0	0			0	0	0	0
86	T-complex protein 1 subunit alpha OS=Homo sapiens GN=TCP1 PE=1 SV=1	P17987	60 kDa	0	0	9	0			0	0	5	0			0	0	0.14	0
87	Twinkle protein, mitochondrial OS=Homo sapiens GN=PEO1 PE=1 SV=1	Q96RR1	77 kDa	0	12	0	0			0	7	0	0			0	0.15	0	0
88	Kelch-like protein 21 OS=Homo sapiens GN=KLHL21 PE=1 SV=4	Q9UJP4	67 kDa	0	0	11	0			0	0	7	0			0	0	0.17	0
89	U1 small nuclear ribonucleoprotein 70 kDa OS=Homo sapiens GN=SNRNP70 PE=1 SV=2	P08621	52 kDa	0	0	9	0			0	0	5	0			0	0	0.16	0
90	D-3-phosphoglycerate dehydrogenase OS=Homo sapiens GN=PHGDH PE=1 SV=4	O43175	57 kDa	0	0	0	7			0	0	0	5			0	0	0	0.14
91	Myoglobin OS=Equus caballus GN=MB PE=1 SV=2	CON_P68082	17 kDa	0	0	0	0			0	0	0	0			0	0	0	0
92	T-complex protein 1 subunit gamma OS=Homo sapiens GN=CCT3 PE=1 SV=4	P49368	61 kDa	0	0	9	0			0	0	4	0			0	0	0.092	0
93	Regulator of nonsense transcripts 1 OS=Homo sapiens GN=UPF1 PE=1 SV=2	Q92900	124 kDa	5	0	0	0			4	0	0	0			0.06	0	0	0
94	Coatomer subunit alpha OS=Homo sapiens GN=COPA PE=1 SV=2	P53621	138 kDa	7	0	0	0			5	0	0	0			0.05	0	0	0
95	Eukaryotic translation initiation factor 3 subunit L OS=Homo sapiens GN=EIF3L PE=1 SV=1	Q9Y262	67 kDa	0	0	11	0			0	0	6	0			0	0	0.15	0
96	Serine/threonine-protein phosphatase 2A 65 kDa regulatory subunit A alpha isoform OS=Homo sapiens GN=PPP2R1A PE=1 SV=4	P30153	65 kDa	0	0	11	0			0	0	5	0			0	0	0.13	0
97	Ubiquitin-60S ribosomal protein L40 OS=Homo sapiens GN=UBA52 PE=1 SV=2	P62987	15 kDa	0	0	0	0			0	0	0	0			0	0	0	0
98	Heterogeneous nuclear ribonucleoprotein D0 OS=Homo sapiens GN=HNRNPD PE=1 SV=1	Q14103	38 kDa	0	0	3	0			0	0	2	0			0	0	0.068	0
99	Vitronectin - Bos taurus	CON_Q3ZBS7	54 kDa	0	11	0	0			0	5	0	0			0	0.18	0	0
100	DNA-binding protein A OS=Homo sapiens GN=CSDA PE=1 SV=4	P16989	40 kDa	0	0	9	0			0	0	3	0			0	0	0.17	0
101	Myosin-14 OS=Homo sapiens GN=MYH14 PE=1 SV=2	Q7Z406	228 kDa	7	0	0	0			5	0	0	0			0.064	0	0	0
102	Transcription factor 25 OS=Homo sapiens GN=TCF25 PE=1 SV=1	Q9BQ70	77 kDa	0	6	0	0			0	4	0	0			0	0.095	0	0
103	EMILIN-2 OS=Homo sapiens GN=EMILIN2 PE=1 SV=3	Q9BXX0	116 kDa	7	0	0	0			5	0	0	0			0.068	0	0	0
104	Periodic tryptophan protein 1 homolog OS=Homo sapiens GN=PWP1 PE=1 SV=1	Q13610	56 kDa	0	7	0	0			0	3	0	0			0	0.096	0	0
105	Pyruvate kinase isozymes M1/M2 OS=Homo sapiens GN=PKM2 PE=1 SV=4	P14618	58 kDa	0	0	0	4			0	0	0	3			0	0	0	0.087
106	RNA-binding protein 39 OS=Homo sapiens GN=RBM39 PE=1 SV=2	Q14498	59 kDa	0	6	0	0			0	4	0	0			0	0.1	0	0
107	Splicing factor, proline- and glutamine-rich OS=Homo sapiens GN=SFPQ PE=1 SV=2	P23246	76 kDa	0	0	0	8			0	0	0	4			0	0	0	0.11
108	DBH-like monooxygenase protein 1 OS=Homo sapiens GN=MOXD1 PE=2 SV=1	Q6UVY6	70 kDa	0	8	0	0			0	4	0	0			0	0.1	0	0
109	Ubiquitin-associated protein 2-like OS=Homo sapiens GN=UBAP2L PE=1 SV=2	Q14157	115 kDa	4	0	0	0			4	0	0	0			0.057	0	0	0
110	Probable ATP-dependent RNA helicase DDX52 OS=Homo sapiens GN=DDX52 PE=1 SV=3	Q9Y2R4	68 kDa	0	0	8	0			0	0	6	0			0	0	0.14	0
111	Heterogeneous nuclear ribonucleoproteins A2/B1 OS=Homo sapiens GN=HNRNPA2B1 PE=1 SV=2	P22626	37 kDa	0	0	0	8			0	0	0	5			0	0	0	0.25
112	CTP synthase 1 OS=Homo sapiens GN=CTPS PE=1 SV=2	P17812	67 kDa	0	9	0	0			0	5	0	0			0	0.12	0	0
113	Poly(U)-binding-splicing factor PUF60 OS=Homo sapiens GN=PUF60 PE=1 SV=1	Q9UHX1	60 kDa	0	0	5	0			0	0	3	0			0	0	0.1	0
114	DNA-dependent protein kinase catalytic subunit OS=Homo sapiens GN=PRKDC PE=1 SV=3	P78527	469 kDa	3	0	0	0			2	0	0	0			0.0048	0	0	0
115	cDNA FLJ58398, highly similar to A-kinase anchor protein 8 OS=Homo sapiens PE=2 SV=1	B4DJ74	65 kDa	0	3	2	0			0	2	2	0			0	0.048	0.046	0
116	Putative pre-mRNA-splicing factor ATP-dependent RNA helicase DHX15 OS=Homo sapiens GN=DHX15 PE=1 SV=2	O43143	91 kDa	0	4	2	0			0	2	1	0			0	0.031	0.015	0
117	Putative uncharacterized protein DKFZp686A13234 (Fragment) OS=Homo sapiens GN=DKFZp686A13234 PE=2 SV=1	Q6MZS5	68 kDa	0	2	1	0			0	1	1	0			0	0.41	0.39	0
118	Histone H2B type 1-J OS=Homo sapiens GN=HIST1H2BJ PE=1 SV=3	P06899	14 kDa	0	0	0	0			0	0	0	0			0	0	0	0
119	Heat shock protein HSP 90-beta OS=Homo sapiens GN=HSP90AB1 PE=1 SV=4	P08238	83 kDa	0	0	0	0			0	0	0	0			0	0	0	0
120	Dynactin subunit 1 OS=Homo sapiens GN=DCTN1 PE=1 SV=3	Q14203	142 kDa	3	0	0	0			3	0	0	0			0.039	0	0	0
121	Splicing factor 3B subunit 1 OS=Homo sapiens GN=SF3B1 PE=1 SV=3	O75533	146 kDa	6	0	0	0			4	0	0	0			0.042	0	0	0
122	RNA-binding motif protein, X chromosome OS=Homo sapiens GN=RBMX PE=1 SV=3	P38159	42 kDa	0	0	0	7			0	0	0	3			0	0	0	0.12
123	SNW domain-containing protein 1 OS=Homo sapiens GN=SNW1 PE=1 SV=1	Q13573	61 kDa	0	0	7	0			0	0	2	0			0	0	0.075	0
124	Keratin, type I cytoskeletal 14 OS=Homo sapiens GN=KRT14 PE=1 SV=4	P02533	52 kDa	0	0	0	0			0	0	0	0			0	0	0	0
125	Profilin-1 OS=Homo sapiens GN=PFN1 PE=1 SV=2	P07737	15 kDa	0	0	0	4			0	0	0	3			0	0	0	0.23
126	Pre-mRNA-splicing factor ATP-dependent RNA helicase PRP16 OS=Homo sapiens GN=DHX38 PE=1 SV=2	Q92620	141 kDa	5	0	0	0			3	0	0	0			0.029	0	0	0
127	Double-stranded RNA-binding protein Staufen homolog 1 OS=Homo sapiens GN=STAU1 PE=1 SV=2	O95793	63 kDa	0	0	4	0			0	0	3	0			0	0	0.068	0
128	Fragile X mental retardation 1 OS=Homo sapiens GN=FMR1 PE=4 SV=1	G3V0J0	67 kDa	0	4	0	0			0	2	0	0			0	0.049	0	0
129	Kinectin OS=Homo sapiens GN=KTN1 PE=1 SV=1	Q86UP2	156 kDa	4	0	0	0			2	0	0	0			0.018	0	0	0
130	Elongation factor 2 OS=Homo sapiens GN=EEF2 PE=1 SV=4	P13639	95 kDa	0	0	0	5			0	0	0	2			0	0	0	0.04
131	Splicing factor 3B subunit 3 OS=Homo sapiens GN=SF3B3 PE=1 SV=4	Q15393	136 kDa	5	0	0	0			2	0	0	0			0.027	0	0	0
132	Synembryn-A OS=Homo sapiens GN=RIC8A PE=1 SV=3	Q9NPQ8	60 kDa	0	0	6	0			0	0	2	0			0	0	0.051	0
133	Nucleolin OS=Homo sapiens GN=NCL PE=1 SV=3	P19338	77 kDa	0	2	0	0			0	2	0	0			0	0.054	0	0
134	Ataxin-2-like protein OS=Homo sapiens GN=ATXN2L PE=1 SV=2	Q8WWM7	113 kDa	0	0	0	0			0	0	0	0			0	0	0	0
135	Alpha-2-HS-glycoprotein precursor - Bos taurus (Bovine)	CON_P12763	38 kDa	0	0	3	0			0	0	1	0			0	0	0.042	0
136	AKAP8 protein OS=Homo sapiens GN=AKAP8 PE=2 SV=1	Q8NE02	76 kDa	0	5	0	0			0	3	0	0			0	0.046	0	0
137	Ataxin-2 OS=Homo sapiens GN=ATXN2 PE=1 SV=2	Q99700	140 kDa	3	0	0	0			2	0	0	0			0.024	0	0	0
138	Peptidyl-prolyl cis-trans isomerase A OS=Homo sapiens GN=PPIA PE=1 SV=2	P62937	18 kDa	0	0	0	5			0	0	0	3			0	0	0	0.25
139	Histone H1.2 OS=Homo sapiens GN=HIST1H1C PE=1 SV=2	P16403	21 kDa	0	0	0	0			0	0	0	0			0	0	0	0
140	U2 snRNP-associated SURP motif-containing protein OS=Homo sapiens GN=U2SURP PE=1 SV=2	O15042	118 kDa	5	0	0	0			4	0	0	0			0.05	0	0	0
141	Condensin complex subunit 1 OS=Homo sapiens GN=NCAPD2 PE=1 SV=3	Q15021	157 kDa	5	0	0	0			3	0	0	0			0.028	0	0	0
142	THO complex subunit 2 OS=Homo sapiens GN=THOC2 PE=1 SV=2	Q8NI27	183 kDa	4	0	0	0			3	0	0	0			0.023	0	0	0
143	Voltage-dependent calcium channel subunit alpha-2/delta-1 OS=Homo sapiens GN=CACNA2D1 PE=1 SV=3	P54289	125 kDa	5	0	0	0			3	0	0	0			0.032	0	0	0
144	RNA-binding protein EWS OS=Homo sapiens GN=EWSR1 PE=1 SV=1	Q01844	68 kDa	0	0	0	5			0	0	0	3			0	0	0	0.073
145	Eukaryotic translation initiation factor 4 gamma 1 OS=Homo sapiens GN=EIF4G1 PE=1 SV=4	Q04637	175 kDa	0	0	0	6			0	0	0	3			0	0	0	0.049
146	Protein TFG OS=Homo sapiens GN=TFG PE=1 SV=2	Q92734	43 kDa	0	0	0	5			0	0	0	3			0	0	0	0.14
147	Heterogeneous nuclear ribonucleoprotein A1 OS=Homo sapiens GN=HNRNPA1 PE=1 SV=5	P09651	39 kDa	0	0	0	3			0	0	0	1			0	0	0	0.043
148	5'-3' exoribonuclease 2 OS=Homo sapiens GN=XRN2 PE=1 SV=1	Q9H0D6	109 kDa	0	4	0	0			0	2	0	0			0	0.028	0	0
149	Guanine nucleotide-binding protein-like 3 OS=Homo sapiens GN=GNL3 PE=1 SV=2	Q9BVP2	62 kDa	0	0	2	0			0	0	2	0			0	0	0.071	0
150	Bcl-2-associated transcription factor 1 OS=Homo sapiens GN=BCLAF1 PE=1 SV=2	Q9NYF8	106 kDa	2	0	0	0			1	0	0	0			0.012	0	0	0
151	60S ribosomal protein L6 OS=Homo sapiens PE=2 SV=1	Q9HBB3	33 kDa	0	3	0	0			0	2	0	0			0	0.11	0	0
152	Histone H3.3 OS=Homo sapiens GN=H3F3A PE=1 SV=2	P84243	15 kDa	0	0	0	0			0	0	0	0			0	0	0	0
153	Phosphoglycerate kinase 1 OS=Homo sapiens GN=PGK1 PE=1 SV=3	P00558	45 kDa	0	0	0	2			0	0	0	2			0	0	0	0.077
154	Rac GTPase-activating protein 1 OS=Homo sapiens GN=RACGAP1 PE=1 SV=1	Q9H0H5	71 kDa	0	2	0	0			0	2	0	0			0	0.038	0	0
155	U3 small nucleolar RNA-associated protein 18 homolog OS=Homo sapiens GN=UTP18 PE=1 SV=3	Q9Y5J1	62 kDa	0	0	5	0			0	0	3	0			0	0	0.085	0
156	Protein angel homolog 1 OS=Homo sapiens GN=ANGEL1 PE=1 SV=1	Q9UNK9	75 kDa	0	4	0	0			0	3	0	0			0	0.082	0	0
157	SF3A2 protein (Fragment) OS=Homo sapiens GN=SF3A2 PE=2 SV=1	Q05DF2	51 kDa	0	0	5	0			0	0	3	0			0	0	0.091	0
158	Guanine nucleotide-binding protein-like 3-like protein OS=Homo sapiens GN=GNL3L PE=1 SV=1	Q9NVN8	66 kDa	0	3	0	0			0	3	0	0			0	0.11	0	0
159	Coiled-coil domain-containing protein 138 OS=Homo sapiens GN=CCDC138 PE=1 SV=1	Q96M89	76 kDa	0	3	0	0			0	2	0	0			0	0.05	0	0
160	Coilin OS=Homo sapiens GN=COIL PE=1 SV=1	P38432	63 kDa	0	2	0	0			0	2	0	0			0	0.045	0	0
161	Keratin 23 (Histone deacetylase inducible) OS=Homo sapiens GN=KRT23 PE=2 SV=1	Q8TC04	48 kDa	0	0	0	0			0	0	0	0			0	0	0	0
162	UNC84B protein OS=Homo sapiens GN=UNC84B PE=2 SV=1	Q2T9F7	80 kDa	0	4	0	0			0	4	0	0			0	0.06	0	0
163	Neuropathy target esterase OS=Homo sapiens GN=PNPLA6 PE=1 SV=2	Q8IY17	150 kDa	4	0	0	0			3	0	0	0			0.045	0	0	0
164	Uveal autoantigen with coiled-coil domains and ankyrin repeats OS=Homo sapiens GN=UACA PE=1 SV=2	Q9BZF9	163 kDa	4	0	0	0			3	0	0	0			0.024	0	0	0
165	DNA-directed RNA polymerase III subunit RPC1 OS=Homo sapiens GN=POLR3A PE=1 SV=2	O14802	156 kDa	3	0	0	0			3	0	0	0			0.028	0	0	0
166	Phosphoribosylformylglycinamidine synthase OS=Homo sapiens GN=PFAS PE=1 SV=4	O15067	145 kDa	0	0	0	0			0	0	0	0			0	0	0	0
167	Fanconi anemia group D2 protein OS=Homo sapiens GN=FANCD2 PE=1 SV=1	Q9BXW9	166 kDa	3	0	0	0			2	0	0	0			0.013	0	0	0
168	Histone deacetylase OS=Homo sapiens GN=HDAC1 PE=2 SV=1	Q6IT96	55 kDa	0	0	2	0			0	0	2	0			0	0	0.06	0
169	IK cytokine, down-regulator of HLA II OS=Homo sapiens GN=IK PE=2 SV=1	Q95HA6	66 kDa	0	2	0	0			0	1	0	0			0	0.016	0	0
170	Extracellular sulfatase Sulf-2 OS=Homo sapiens GN=SULF2 PE=1 SV=1	Q8IWU5	100 kDa	0	2	0	0			0	1	0	0			0	0.015	0	0
171	AP-3 complex subunit delta-1 OS=Homo sapiens GN=AP3D1 PE=1 SV=1	O14617	130 kDa	3	0	0	0			2	0	0	0			0.029	0	0	0
172	Apoptosis-inducing factor 1, mitochondrial OS=Homo sapiens GN=AIFM1 PE=1 SV=1	O95831	67 kDa	0	0	4	0			0	0	2	0			0	0	0.044	0
173	Annexin A7 OS=Homo sapiens GN=ANXA7 PE=1 SV=3	P20073	53 kDa	0	0	0	3			0	0	0	2			0	0	0	0.051
174	Calcium/calmodulin-dependent protein kinase type II subunit gamma OS=Homo sapiens GN=CAMK2G PE=1 SV=3	Q13555	63 kDa	0	0	4	0			0	0	2	0			0	0	0.079	0
175	Acid sphingomyelinase-like phosphodiesterase 3b OS=Homo sapiens GN=SMPDL3B PE=2 SV=2	Q92485	51 kDa	0	0	4	0			0	0	2	0			0	0	0.057	0
176	Regulator of nonsense transcripts 3B OS=Homo sapiens GN=UPF3B PE=1 SV=1	Q9BZI7	58 kDa	0	0	4	0			0	0	2	0			0	0	0.041	0
177	ATP-dependent RNA helicase DHX29 OS=Homo sapiens GN=DHX29 PE=1 SV=2	Q7Z478	155 kDa	1	0	0	0			1	0	0	0			0.0073	0	0	0
178	DNA repair protein RAD50 OS=Homo sapiens GN=RAD50 PE=1 SV=1	Q92878	154 kDa	2	0	0	0			1	0	0	0			0.0061	0	0	0
179	Double-stranded RNA-binding protein Staufen homolog 2 OS=Homo sapiens GN=STAU2 PE=1 SV=1	Q9NUL3	63 kDa	0	0	1	0			0	0	1	0			0	0	0.021	0
180	Golgi apparatus protein 1 OS=Homo sapiens GN=GLG1 PE=1 SV=2	Q92896	135 kDa	1	0	0	0			1	0	0	0			0.0085	0	0	0
181	RNA-binding protein 6 OS=Homo sapiens GN=RBM6 PE=1 SV=5	P78332	129 kDa	1	0	0	0			1	0	0	0			0.012	0	0	0
182	Putative protein FAM90A7 OS=Homo sapiens GN=FAM90A7 PE=2 SV=1	A6NKC0	50 kDa	1	0	0	0			1	0	0	0			0.017	0	0	0
183	X-ray repair cross-complementing protein 6 OS=Homo sapiens GN=XRCC6 PE=1 SV=2	P12956	70 kDa	0	1	0	0			0	1	0	0			0	0.023	0	0
184	Junction plakoglobin OS=Homo sapiens GN=JUP PE=3 SV=1	F5GWP8	66 kDa	0	3	0	0			0	2	0	0			0	0.059	0	0
185	Zinc finger protein 207 OS=Homo sapiens GN=ZNF207 PE=1 SV=1	O43670	51 kDa	0	0	0	3			0	0	0	2			0	0	0	0.029
186	Heterogeneous nuclear ribonucleoprotein H3 OS=Homo sapiens GN=HNRNPH3 PE=1 SV=2	P31942	37 kDa	0	0	0	3			0	0	0	2			0	0	0	0.11
187	T-complex protein 1 subunit epsilon OS=Homo sapiens GN=CCT5 PE=1 SV=1	P48643	60 kDa	0	0	3	0			0	0	2	0			0	0	0.048	0
188	Tubulin beta-4B chain OS=Homo sapiens GN=TUBB4B PE=1 SV=1	P68371	50 kDa	0	0	3	0			0	0	2	0			0	0	0.37	0
189	Splicing factor 3b, subunit 4 variant (Fragment) OS=Homo sapiens PE=2 SV=1	Q53FG6	44 kDa	0	0	0	3			0	0	0	2			0	0	0	0.073
190	Protein angel homolog 2 OS=Homo sapiens GN=ANGEL2 PE=2 SV=1	Q5VTE6	62 kDa	0	0	3	0			0	0	2	0			0	0	0.072	0
191	CWF19-like protein 1 OS=Homo sapiens GN=CWF19L1 PE=1 SV=2	Q69YN2	61 kDa	0	0	2	0			0	0	2	0			0	0	0.052	0
192	Beta-enolase OS=Homo sapiens GN=ENO3 PE=1 SV=4	P13929	47 kDa	0	0	0	0			0	0	0	0			0	0	0	0
193	Melanoma-associated antigen D2 OS=Homo sapiens GN=MAGED2 PE=1 SV=2	Q9UNF1	65 kDa	0	2	0	0			0	2	0	0			0	0.045	0	0
194	Zinc finger protein 768 OS=Homo sapiens GN=ZNF768 PE=1 SV=2	Q9H5H4	60 kDa	0	2	0	0			0	1	0	0			0	0.019	0	0
195	ATPase family AAA domain-containing protein 3B OS=Homo sapiens GN=ATAD3B PE=1 SV=1	Q5T9A4	73 kDa	0	0	2	0			0	0	1	0			0	0	0.14	0
196	Protein C16orf88 OS=Homo sapiens GN=C16orf88 PE=1 SV=1	Q1ED39	52 kDa	0	0	2	0			0	0	1	0			0	0	0.031	0
197	Probable ATP-dependent RNA helicase DHX36 OS=Homo sapiens GN=DHX36 PE=1 SV=2	Q9H2U1	115 kDa	0	1	0	0			0	1	0	0			0	0.014	0	0
198	Cell division control protein 45 homolog OS=Homo sapiens GN=CDC45 PE=1 SV=1	O75419	66 kDa	0	0	2	0			0	0	1	0			0	0	0.018	0
199	U4/U6.U5 tri-snRNP-associated protein 2 OS=Homo sapiens GN=USP39 PE=1 SV=2	Q53GS9	65 kDa	0	0	2	0			0	0	1	0			0	0	0.034	0
200	Amyloid beta A4 precursor protein-binding family B member 1 OS=Homo sapiens GN=APBB1 PE=1 SV=2	O00213	77 kDa	0	0	1	0			0	0	1	0			0	0	0.027	0
201	Versican core protein OS=Homo sapiens GN=VCAN PE=1 SV=3	P13611	373 kDa	2	0	0	0			1	0	0	0			0.0035	0	0	0
202	Junction plakoglobin OS=Homo sapiens GN=JUP PE=1 SV=3	P14923	82 kDa	0	2	0	0			0	1	0	0			0	0.059	0	0
203	Protein FAM98A OS=Homo sapiens GN=FAM98A PE=1 SV=1	Q8NCA5	55 kDa	0	0	2	0			0	0	2	0			0	0	0.05	0
204	Myelin expression factor 2 OS=Homo sapiens GN=MYEF2 PE=1 SV=3	Q9P2K5	64 kDa	0	2	0	0			0	2	0	0			0	0.078	0	0
205	Lipocalin-1 OS=Homo sapiens GN=LCN1 PE=1 SV=1	P31025	19 kDa	0	0	0	0			0	0	0	0			0	0	0	0
206	Serine--tRNA ligase, cytoplasmic OS=Homo sapiens GN=SARS PE=1 SV=3	P49591	59 kDa	0	0	0	0			0	0	0	0			0	0	0	0
207	60S ribosomal protein L7 OS=Homo sapiens GN=RPL7 PE=1 SV=1	P18124	29 kDa	0	0	0	1			0	0	0	1			0	0	0	0.044
208	Complement decay-accelerating factor OS=Homo sapiens GN=CD55 PE=1 SV=4	P08174	41 kDa	0	1	0	0			0	1	0	0			0	0.024	0	0
209	DNA-directed RNA polymerase II subunit RPB1 OS=Homo sapiens GN=POLR2A PE=1 SV=2	P24928	217 kDa	0	0	0	1			0	0	0	1			0	0	0	0.0071
210	Non-POU domain-containing octamer-binding protein OS=Homo sapiens GN=NONO PE=1 SV=4	Q15233	54 kDa	0	0	0	0			0	0	0	0			0	0	0	0
211	Signal recognition particle 72 kDa protein OS=Homo sapiens GN=SRP72 PE=1 SV=3	O76094	75 kDa	0	1	0	0			0	1	0	0			0	0.016	0	0
212	Melanoma-associated antigen D1 OS=Homo sapiens GN=MAGED1 PE=1 SV=3	Q9Y5V3	86 kDa	0	1	0	0			0	1	0	0			0	0.019	0	0
END OF FILE

## Sheet: 2B On Bead
			# of assigned spectra
Identified Proteins (34)	Accession Number	Molecular Weight	on bead
Keratin, type II cytoskeletal 1	P04264	66 kDa	62
Keratin, type I cytoskeletal 9	CON_P35527	62 kDa	41
Keratin, type I cytoskeletal 10	CON_P13645	60 kDa	12
RNA-binding protein 14	Q96PK6	69 kDa	9
Tubulin alpha-1B chain	P68363	50 kDa	9
RNA-binding protein FUS	P35637	53 kDa	8
Splicing factor, proline- and glutamine-rich	P23246	76 kDa	8
Heterogeneous nuclear ribonucleoproteins A2/B1	P22626	37 kDa	8
Actin, cytoplasmic 1	P60709	42 kDa	7
D-3-phosphoglycerate dehydrogenase	O43175	57 kDa	7
RNA-binding motif protein, X chromosome	P38159	42 kDa	7
EIF4G1 protein	B2RU06	176 kDa	6
Heterogeneous nuclear ribonucleoprotein K	P61978	51 kDa	5
Elongation factor 2	P13639	95 kDa	5
Peptidyl-prolyl cis-trans isomerase A	P62937	18 kDa	5
TRK-fused	G5E9V1	43 kDa	5
RNA-binding protein EWS	Q01844	68 kDa	5
Heterogeneous nuclear ribonucleoprotein U-like protein 1	Q9BUJ2	96 kDa	4
Keratin, type I cytoskeletal 16	P08779	51 kDa	4
Keratin, type II cytoskeletal 6B	CON_P04259	60 kDa	4
Heterogeneous nuclear ribonucleoprotein H	P31943	49 kDa	4
Pyruvate kinase isozymes M1/M2	P14618	58 kDa	4
Profilin-1	P07737	15 kDa	4
Keratin, type II cytoskeletal 2 epidermal	P35908	65 kDa	3
Heterogeneous nuclear ribonucleoprotein A1	P09651	39 kDa	3
Annexin A7	P20073	53 kDa	3
Zinc finger protein 207	O43670	51 kDa	3
Heterogeneous nuclear ribonucleoprotein H3	P31942	37 kDa	3
Splicing factor 3b, subunit 4 variant (Fragment)	Q53FG6	44 kDa	3
Heat shock 70 kDa protein 1A/1B	P08107	70 kDa	2
Phosphoglycerate kinase 1	P00558	45 kDa	2
Polyadenylate-binding protein 1	P11940	71 kDa	1
60S ribosomal protein L7	P18124	29 kDa	1
DNA-directed RNA polymerase II subunit RPB1	P24928	217 kDa	1

## Sheet: PA-FG Beads
			# of assigned spectra
Identified Proteins (166)	Accession Number	Molecular Weight	top band	middle band	bottom band	total
ATP-dependent RNA helicase DDX3X	O00571	73 kDa	16	658	42	716
Heterogeneous nuclear ribonucleoprotein Q	O60506	70 kDa	1	73	266	340
KH domain-containing, RNA-binding, signal transduction-associated protein 1	Q07666	48 kDa	2	16	248	266
Myosin-10	P35580	229 kDa	153	22	11	186
PABPC4 protein	Q4VC03	72 kDa	0	159	20	179
Heterogeneous nuclear ribonucleoprotein K	P61978	51 kDa	5	9	149	163
La-related protein 1	Q6PKG0	124 kDa	144	2	0	146
Myosin-9	P35579	227 kDa	109	10	9	128
Heterogeneous nuclear ribonucleoprotein M	P52272	78 kDa	0	121	4	125
Heterogeneous nuclear ribonucleoprotein R	O43390	71 kDa	0	60	59	119
Keratin, type II cytoskeletal 1	P04264	66 kDa	36	23	54	113
Probable ATP-dependent RNA helicase DDX5	P17844	69 kDa	0	19	84	103
Myb-binding protein 1A	Q9BQG0	149 kDa	94	0	0	94
Polyadenylate-binding protein 1	P11940	71 kDa	0	81	12	93
Pentatricopeptide repeat-containing protein 3, mitochondrial	Q96EY7	79 kDa	0	92	0	92
Keratin, type I cytoskeletal 9 - Homo sapiens (Human)	CON_P35527	62 kDa	17	13	52	82
Probable ATP-dependent RNA helicase YTHDC2	Q9H6S0	160 kDa	81	0	0	81
RNA-binding protein 14	Q96PK6	69 kDa	0	70	6	76
Keratin, type I cytoskeletal 10 - Homo sapiens (Human)	CON_P13645	60 kDa	32	15	16	63
Sorting nexin-9	Q9Y5X1	67 kDa	0	63	0	63
ATP-dependent RNA helicase A	Q08211	141 kDa	49	10	3	62
Zinc finger protein 326	A8MYX1	66 kDa	0	57	0	57
Insulin-like growth factor 2 mRNA-binding protein 1	Q9NZI8	63 kDa	0	8	49	57
Heterogeneous nuclear ribonucleoprotein L	P14866	64 kDa	0	4	48	52
La-related protein 7	Q4G0J3	67 kDa	0	50	0	50
Insulin receptor substrate 4	O14654	134 kDa	49	0	0	49
Trifunctional enzyme subunit alpha, mitochondrial	P40939	83 kDa	0	44	0	44
Keratin, type II cytoskeletal 2 epidermal	P35908	65 kDa	15	3	22	40
Protein transport protein Sec16A	O15027	234 kDa	37	0	0	37
Desmoglein-2	Q14126	122 kDa	37	0	0	37
Heat shock cognate 71 kDa protein	P11142	71 kDa	0	28	5	33
TAF15 RNA polymerase II, TATA box binding protein (TBP)-associated factor, 68kDa	Q86X94	62 kDa	0	30	2	32
DEAD (Asp-Glu-Ala-Asp) box polypeptide 17 (Fragment)	Q59F66	81 kDa	0	23	8	31
Tubulin beta chain	P07437	50 kDa	0	2	27	29
78 kDa glucose-regulated protein	P11021	72 kDa	0	29	0	29
Putative ATP-dependent RNA helicase DHX57	Q6P158	156 kDa	29	0	0	29
Tetratricopeptide repeat protein 37	Q6PGP7	175 kDa	29	0	0	29
Heat shock 70 kDa protein 1A/1B	P08107	70 kDa	0	15	13	28
Heterogeneous nuclear ribonucleoprotein U-like protein 1	Q9BUJ2	96 kDa	10	10	8	28
Heterogeneous nuclear ribonucleoprotein U	Q00839	91 kDa	3	20	4	27
G protein-binding protein CRFG variant (Fragment)	Q53GS0	74 kDa	0	27	0	27
Cytospin-A	Q69YQ0	125 kDa	26	0	0	26
Insulin-like growth factor 2 mRNA-binding protein 3	O00425	64 kDa	0	10	15	25
RSL1D1 protein (Fragment)	Q32Q62	52 kDa	0	0	24	24
Pentatricopeptide repeat domain 1	Q3ZB84	79 kDa	0	24	0	24
RNA-binding protein FUS	P35637	53 kDa	0	5	18	23
Stress-70 protein, mitochondrial	P38646	74 kDa	0	23	0	23
Protein flightless-1 homolog	Q13045	145 kDa	20	0	0	20
Myosin phosphatase Rho interacting protein	B9EGI2	118 kDa	19	0	0	19
Splicing factor U2AF 65 kDa subunit	P26368	54 kDa	0	0	18	18
ATPase family AAA domain-containing protein 3A	Q9NVI7	71 kDa	0	0	18	18
Nucleolar protein 58	Q9Y2X3	60 kDa	0	0	18	18
Vigilin	Q00341	141 kDa	16	0	0	16
Protein LYRIC	Q86UE4	64 kDa	0	16	0	16
Nitric oxide-associated protein 1	Q8NC60	78 kDa	0	16	0	16
Eukaryotic translation initiation factor 3 subunit D	O15371	64 kDa	0	0	15	15
ATP-dependent RNA helicase DDX1	Q92499	82 kDa	0	15	0	15
Far upstream element-binding protein 3	Q96I24	62 kDa	0	0	15	15
Isoleucine--tRNA ligase, cytoplasmic	P41252	145 kDa	14	0	0	14
ATP-binding cassette, sub-family F (GCN20), member 2	Q75MJ0	71 kDa	0	14	0	14
Galectin-3-binding protein	Q08380	65 kDa	0	13	0	13
Insulin-like growth factor 2 mRNA-binding protein 2	Q9Y6M1	66 kDa	0	0	13	13
Heterogeneous nuclear ribonucleoprotein H	P31943	49 kDa	6	0	6	12
Tubulin alpha-1B chain	P68363	50 kDa	1	1	10	12
Helicase SKI2W	Q15477	138 kDa	12	0	0	12
Twinkle protein, mitochondrial	Q96RR1	77 kDa	0	12	0	12
Ribonuclease 3	Q9NRR4	159 kDa	12	0	0	12
Serine/threonine-protein phosphatase 2A 65 kDa regulatory subunit A alpha isoform	P30153	65 kDa	0	0	11	11
Kelch-like protein 21	Q9UJP4	67 kDa	0	0	11	11
Eukaryotic translation initiation factor 3 subunit L	Q9Y262	67 kDa	0	0	11	11
Crooked neck-like protein 1	Q9BZJ0	100 kDa	0	10	0	10
U1 small nuclear ribonucleoprotein 70 kDa	P08621	52 kDa	0	0	9	9
DNA-binding protein A	P16989	40 kDa	0	0	9	9
CTP synthase 1	P17812	67 kDa	0	9	0	9
T-complex protein 1 subunit alpha	P17987	60 kDa	0	0	9	9
T-complex protein 1 subunit gamma	P49368	61 kDa	0	0	9	9
Structural maintenance of chromosomes protein 1A	Q14683	143 kDa	9	0	0	9
Histone deacetylase 6	Q9UBN7	131 kDa	9	0	0	9
Keratin, type II cytoskeletal 6B - Homo sapiens (Human)	CON_P04259	60 kDa	3	2	3	8
TBC1 domain family member 9B	Q66K14	141 kDa	8	0	0	8
DBH-like monooxygenase protein 1	Q6UVY6	70 kDa	0	8	0	8
Probable ATP-dependent RNA helicase DDX52	Q9Y2R4	68 kDa	0	0	8	8
Coatomer subunit alpha	P53621	138 kDa	7	0	0	7
SNW domain-containing protein 1	Q13573	61 kDa	0	0	7	7
Periodic tryptophan protein 1 homolog	Q13610	56 kDa	0	7	0	7
Scaffold attachment factor B2	Q14151	107 kDa	7	0	0	7
Mov10, Moloney leukemia virus 10, homolog (Mouse)	Q5JR04	107 kDa	0	7	0	7
Myosin-14	Q7Z406	228 kDa	7	0	0	7
EMILIN-2	Q9BXX0	116 kDa	7	0	0	7
Putative pre-mRNA-splicing factor ATP-dependent RNA helicase DHX15	O43143	91 kDa	0	4	2	6
Splicing factor 3B subunit 1	O75533	146 kDa	6	0	0	6
RNA-binding protein 39	Q14498	59 kDa	0	6	0	6
Transcription factor 25	Q9BQ70	77 kDa	0	6	0	6
Synembryn-A	Q9NPQ8	60 kDa	0	0	6	6
cDNA FLJ58398, highly similar to A-kinase anchor protein 8	B4DJ74	65 kDa	0	3	2	5
U2 snRNP-associated SURP motif-containing protein	O15042	118 kDa	5	0	0	5
Voltage-dependent calcium channel subunit alpha-2/delta-1	P54289	125 kDa	5	0	0	5
SF3A2 protein (Fragment)	Q05DF2	51 kDa	0	0	5	5
Condensin complex subunit 1	Q15021	157 kDa	5	0	0	5
Splicing factor 3B subunit 3	Q15393	136 kDa	5	0	0	5
AKAP8 protein	Q8NE02	76 kDa	0	5	0	5
Pre-mRNA-splicing factor ATP-dependent RNA helicase PRP16	Q92620	141 kDa	5	0	0	5
Regulator of nonsense transcripts 1	Q92900	124 kDa	5	0	0	5
Poly(U)-binding-splicing factor PUF60	Q9UHX1	60 kDa	0	0	5	5
U3 small nucleolar RNA-associated protein 18 homolog	Q9Y5J1	62 kDa	0	0	5	5
Fragile X mental retardation 1	G3V0J0	67 kDa	0	4	0	4
Double-stranded RNA-binding protein Staufen homolog 1	O95793	63 kDa	0	0	4	4
Apoptosis-inducing factor 1, mitochondrial	O95831	67 kDa	0	0	4	4
Keratin, type II cytoskeletal 5	P13647	62 kDa	4	0	0	4
Calcium/calmodulin-dependent protein kinase type II subunit gamma	Q13555	63 kDa	0	0	4	4
Ubiquitin-associated protein 2-like	Q14157	115 kDa	4	0	0	4
UNC84B protein	Q2T9F7	80 kDa	0	4	0	4
Kinectin	Q86UP2	156 kDa	4	0	0	4
Neuropathy target esterase	Q8IY17	150 kDa	4	0	0	4
THO complex subunit 2	Q8NI27	183 kDa	4	0	0	4
Acid sphingomyelinase-like phosphodiesterase 3b	Q92485	51 kDa	0	0	4	4
Uveal autoantigen with coiled-coil domains and ankyrin repeats	Q9BZF9	163 kDa	4	0	0	4
Regulator of nonsense transcripts 3B	Q9BZI7	58 kDa	0	0	4	4
5'-3' exoribonuclease 2	Q9H0D6	109 kDa	0	4	0	4
Protein angel homolog 1	Q9UNK9	75 kDa	0	4	0	4
Junction plakoglobin	F5GWP8	66 kDa	0	3	0	3
AP-3 complex subunit delta-1	O14617	130 kDa	3	0	0	3
DNA-directed RNA polymerase III subunit RPC1	O14802	156 kDa	3	0	0	3
T-complex protein 1 subunit epsilon	P48643	60 kDa	0	0	3	3
Tubulin beta-4B chain	P68371	50 kDa	0	0	3	3
DNA-dependent protein kinase catalytic subunit	P78527	469 kDa	3	0	0	3
Heterogeneous nuclear ribonucleoprotein D0	Q14103	38 kDa	0	0	3	3
Dynactin subunit 1	Q14203	142 kDa	3	0	0	3
Protein angel homolog 2	Q5VTE6	62 kDa	0	0	3	3
Putative uncharacterized protein DKFZp686A13234 (Fragment)	Q6MZS5	68 kDa	0	2	1	3
Coiled-coil domain-containing protein 138	Q96M89	76 kDa	0	3	0	3
Ataxin-2	Q99700	140 kDa	3	0	0	3
Fanconi anemia group D2 protein	Q9BXW9	166 kDa	3	0	0	3
60S ribosomal protein L6	Q9HBB3	33 kDa	0	3	0	3
Guanine nucleotide-binding protein-like 3-like protein	Q9NVN8	66 kDa	0	3	0	3
Cell division control protein 45 homolog	O75419	66 kDa	0	0	2	2
Versican core protein	P13611	373 kDa	2	0	0	2
Junction plakoglobin	P14923	82 kDa	0	2	0	2
Nucleolin	P19338	77 kDa	0	2	0	2
Coilin	P38432	63 kDa	0	2	0	2
Protein C16orf88	Q1ED39	52 kDa	0	0	2	2
U4/U6.U5 tri-snRNP-associated protein 2	Q53GS9	65 kDa	0	0	2	2
ATPase family AAA domain-containing protein 3B	Q5T9A4	73 kDa	0	0	2	2
CWF19-like protein 1	Q69YN2	61 kDa	0	0	2	2
Histone deacetylase	Q6IT96	55 kDa	0	0	2	2
Extracellular sulfatase Sulf-2	Q8IWU5	100 kDa	0	2	0	2
Protein FAM98A	Q8NCA5	55 kDa	0	0	2	2
DNA repair protein RAD50	Q92878	154 kDa	2	0	0	2
IK cytokine, down-regulator of HLA II	Q95HA6	66 kDa	0	2	0	2
Guanine nucleotide-binding protein-like 3	Q9BVP2	62 kDa	0	0	2	2
Rac GTPase-activating protein 1	Q9H0H5	71 kDa	0	2	0	2
Zinc finger protein 768	Q9H5H4	60 kDa	0	2	0	2
Bcl-2-associated transcription factor 1	Q9NYF8	106 kDa	2	0	0	2
Myelin expression factor 2	Q9P2K5	64 kDa	0	2	0	2
Melanoma-associated antigen D2	Q9UNF1	65 kDa	0	2	0	2
Putative protein FAM90A7	A6NKC0	50 kDa	1	0	0	1
Amyloid beta A4 precursor protein-binding family B member 1	O00213	77 kDa	0	0	1	1
Signal recognition particle 72 kDa protein	O76094	75 kDa	0	1	0	1
Complement decay-accelerating factor	P08174	41 kDa	0	1	0	1
X-ray repair cross-complementing protein 6	P12956	70 kDa	0	1	0	1
RNA-binding protein 6	P78332	129 kDa	1	0	0	1
ATP-dependent RNA helicase DHX29	Q7Z478	155 kDa	1	0	0	1
Golgi apparatus protein 1	Q92896	135 kDa	1	0	0	1
Probable ATP-dependent RNA helicase DHX36	Q9H2U1	115 kDa	0	1	0	1
Double-stranded RNA-binding protein Staufen homolog 2	Q9NUL3	63 kDa	0	0	1	1
Melanoma-associated antigen D1	Q9Y5V3	86 kDa	0	1	0	1

## Sheet: 2B vs PA-FG Beads
			# of assigned spectra
Identified Proteins	Accession Number	Molecular Weight	top band	middle band	bottom band	total	on bead
Keratin, type II cytoskeletal 1	P04264	66 kDa	36	23	54	113	62
RNA-binding protein 14	Q96PK6	69 kDa	0	70	6	76	9
Tubulin alpha-1B chain	P68363	50 kDa	1	1	10	12	9
RNA-binding protein FUS	P35637	53 kDa	0	5	18	23	8
Splicing factor, proline- and glutamine-rich	P23246	76 kDa	0	0	0	0	8
Heterogeneous nuclear ribonucleoproteins A2/B1	P22626	37 kDa	0	0	0	0	8
Actin, cytoplasmic 1	P60709	42 kDa	0	0	0	0	7
D-3-phosphoglycerate dehydrogenase	O43175	57 kDa	0	0	0	0	7
RNA-binding motif protein, X chromosome	P38159	42 kDa	0	0	0	0	7
Eukaryotic translation initiation factor 4 gamma 1	Q04637	175 kDa	0	0	0	0	6
Heterogeneous nuclear ribonucleoprotein K	P61978	51 kDa	5	9	149	163	5
Elongation factor 2	P13639	95 kDa	0	0	0	0	5
Peptidyl-prolyl cis-trans isomerase A	P62937	18 kDa	0	0	0	0	5
RNA-binding protein EWS	Q01844	68 kDa	0	0	0	0	5
Protein TFG	Q92734	43 kDa	0	0	0	0	5
Heterogeneous nuclear ribonucleoprotein U-like protein 1	Q9BUJ2	96 kDa	10	10	8	28	4
Heterogeneous nuclear ribonucleoprotein H	P31943	49 kDa	6	0	6	12	4
Keratin, type I cytoskeletal 16	P08779	51 kDa	0	0	0	0	4
Pyruvate kinase isozymes M1/M2	P14618	58 kDa	0	0	0	0	4
Profilin-1	P07737	15 kDa	0	0	0	0	4
Keratin, type II cytoskeletal 2 epidermal	P35908	65 kDa	15	3	22	40	3
Heterogeneous nuclear ribonucleoprotein A1	P09651	39 kDa	0	0	0	0	3
Annexin A7	P20073	53 kDa	0	0	0	0	3
Zinc finger protein 207	O43670	51 kDa	0	0	0	0	3
Heterogeneous nuclear ribonucleoprotein H3	P31942	37 kDa	0	0	0	0	3
Splicing factor 3b, subunit 4 variant (Fragment)	Q53FG6	44 kDa	0	0	0	0	3
Heat shock 70 kDa protein 1A/1B	P08107	70 kDa	0	15	13	28	2
Phosphoglycerate kinase 1	P00558	45 kDa	0	0	0	0	2
Polyadenylate-binding protein 1	P11940	71 kDa	0	81	12	93	1
60S ribosomal protein L7	P18124	29 kDa	0	0	0	0	1
DNA-directed RNA polymerase II subunit RPB1	P24928	217 kDa	0	0	0	0	1
ATP-dependent RNA helicase DDX3X	O00571	73 kDa	16	658	42	716	0
Heterogeneous nuclear ribonucleoprotein Q	O60506	70 kDa	1	73	266	340	0
KH domain-containing, RNA-binding, signal transduction-associated protein 1	Q07666	48 kDa	2	16	248	266	0
Myosin-10	P35580	229 kDa	153	22	11	186	0
PABPC4 protein	Q4VC03	72 kDa	0	159	20	179	0
La-related protein 1	Q6PKG0	124 kDa	144	2	0	146	0
Myosin-9	P35579	227 kDa	109	10	9	128	0
Heterogeneous nuclear ribonucleoprotein M	P52272	78 kDa	0	121	4	125	0
Heterogeneous nuclear ribonucleoprotein R	O43390	71 kDa	0	60	59	119	0
Probable ATP-dependent RNA helicase DDX5	P17844	69 kDa	0	19	84	103	0
Myb-binding protein 1A	Q9BQG0	149 kDa	94	0	0	94	0
Pentatricopeptide repeat-containing protein 3, mitochondrial	Q96EY7	79 kDa	0	92	0	92	0
Probable ATP-dependent RNA helicase YTHDC2	Q9H6S0	160 kDa	81	0	0	81	0
Sorting nexin-9	Q9Y5X1	67 kDa	0	63	0	63	0
ATP-dependent RNA helicase A	Q08211	141 kDa	49	10	3	62	0
Insulin-like growth factor 2 mRNA-binding protein 1	Q9NZI8	63 kDa	0	8	49	57	0
Zinc finger protein 326	A8MYX1	66 kDa	0	57	0	57	0
Heterogeneous nuclear ribonucleoprotein L	P14866	64 kDa	0	4	48	52	0
La-related protein 7	Q4G0J3	67 kDa	0	50	0	50	0
Insulin receptor substrate 4	O14654	134 kDa	49	0	0	49	0
Trifunctional enzyme subunit alpha, mitochondrial	P40939	83 kDa	0	44	0	44	0
Protein transport protein Sec16A	O15027	234 kDa	37	0	0	37	0
Desmoglein-2	Q14126	122 kDa	37	0	0	37	0
Heat shock cognate 71 kDa protein	P11142	71 kDa	0	28	5	33	0
TAF15 RNA polymerase II, TATA box binding protein (TBP)-associated factor, 68kDa	Q86X94	62 kDa	0	30	2	32	0
DEAD (Asp-Glu-Ala-Asp) box polypeptide 17 (Fragment)	Q59F66	81 kDa	0	23	8	31	0
Tubulin beta chain	P07437	50 kDa	0	2	27	29	0
Putative ATP-dependent RNA helicase DHX57	Q6P158	156 kDa	29	0	0	29	0
Tetratricopeptide repeat protein 37	Q6PGP7	175 kDa	29	0	0	29	0
78 kDa glucose-regulated protein	P11021	72 kDa	0	29	0	29	0
Heterogeneous nuclear ribonucleoprotein U	Q00839	91 kDa	3	20	4	27	0
G protein-binding protein CRFG variant (Fragment)	Q53GS0	74 kDa	0	27	0	27	0
Cytospin-A	Q69YQ0	125 kDa	26	0	0	26	0
Insulin-like growth factor 2 mRNA-binding protein 3	O00425	64 kDa	0	10	15	25	0
Pentatricopeptide repeat domain 1	Q3ZB84	79 kDa	0	24	0	24	0
RSL1D1 protein (Fragment)	Q32Q62	52 kDa	0	0	24	24	0
Stress-70 protein, mitochondrial	P38646	74 kDa	0	23	0	23	0
Protein flightless-1 homolog	Q13045	145 kDa	20	0	0	20	0
Myosin phosphatase Rho interacting protein	B9EGI2	118 kDa	19	0	0	19	0
Splicing factor U2AF 65 kDa subunit	P26368	54 kDa	0	0	18	18	0
ATPase family AAA domain-containing protein 3A	Q9NVI7	71 kDa	0	0	18	18	0
Nucleolar protein 58	Q9Y2X3	60 kDa	0	0	18	18	0
Vigilin	Q00341	141 kDa	16	0	0	16	0
Protein LYRIC	Q86UE4	64 kDa	0	16	0	16	0
Nitric oxide-associated protein 1	Q8NC60	78 kDa	0	16	0	16	0
ATP-dependent RNA helicase DDX1	Q92499	82 kDa	0	15	0	15	0
Far upstream element-binding protein 3	Q96I24	62 kDa	0	0	15	15	0
Eukaryotic translation initiation factor 3 subunit D	O15371	64 kDa	0	0	15	15	0
Isoleucine--tRNA ligase, cytoplasmic	P41252	145 kDa	14	0	0	14	0
ATP-binding cassette, sub-family F (GCN20), member 2	Q75MJ0	71 kDa	0	14	0	14	0
Insulin-like growth factor 2 mRNA-binding protein 2	Q9Y6M1	66 kDa	0	0	13	13	0
Galectin-3-binding protein	Q08380	65 kDa	0	13	0	13	0
Helicase SKI2W	Q15477	138 kDa	12	0	0	12	0
Ribonuclease 3	Q9NRR4	159 kDa	12	0	0	12	0
Twinkle protein, mitochondrial	Q96RR1	77 kDa	0	12	0	12	0
Kelch-like protein 21	Q9UJP4	67 kDa	0	0	11	11	0
Eukaryotic translation initiation factor 3 subunit L	Q9Y262	67 kDa	0	0	11	11	0
Serine/threonine-protein phosphatase 2A 65 kDa regulatory subunit A alpha isoform	P30153	65 kDa	0	0	11	11	0
Crooked neck-like protein 1	Q9BZJ0	100 kDa	0	10	0	10	0
Structural maintenance of chromosomes protein 1A	Q14683	143 kDa	9	0	0	9	0
Histone deacetylase 6	Q9UBN7	131 kDa	9	0	0	9	0
T-complex protein 1 subunit alpha	P17987	60 kDa	0	0	9	9	0
U1 small nuclear ribonucleoprotein 70 kDa	P08621	52 kDa	0	0	9	9	0
T-complex protein 1 subunit gamma	P49368	61 kDa	0	0	9	9	0
DNA-binding protein A	P16989	40 kDa	0	0	9	9	0
CTP synthase 1	P17812	67 kDa	0	9	0	9	0
TBC1 domain family member 9B	Q66K14	141 kDa	8	0	0	8	0
DBH-like monooxygenase protein 1	Q6UVY6	70 kDa	0	8	0	8	0
Probable ATP-dependent RNA helicase DDX52	Q9Y2R4	68 kDa	0	0	8	8	0
Scaffold attachment factor B2	Q14151	107 kDa	7	0	0	7	0
Mov10, Moloney leukemia virus 10, homolog (Mouse)	Q5JR04	107 kDa	0	7	0	7	0
Coatomer subunit alpha	P53621	138 kDa	7	0	0	7	0
Myosin-14	Q7Z406	228 kDa	7	0	0	7	0
EMILIN-2	Q9BXX0	116 kDa	7	0	0	7	0
Periodic tryptophan protein 1 homolog	Q13610	56 kDa	0	7	0	7	0
SNW domain-containing protein 1	Q13573	61 kDa	0	0	7	7	0
Transcription factor 25	Q9BQ70	77 kDa	0	6	0	6	0
RNA-binding protein 39	Q14498	59 kDa	0	6	0	6	0
Putative pre-mRNA-splicing factor ATP-dependent RNA helicase DHX15	O43143	91 kDa	0	4	2	6	0
Splicing factor 3B subunit 1	O75533	146 kDa	6	0	0	6	0
Synembryn-A	Q9NPQ8	60 kDa	0	0	6	6	0
Regulator of nonsense transcripts 1	Q92900	124 kDa	5	0	0	5	0
Poly(U)-binding-splicing factor PUF60	Q9UHX1	60 kDa	0	0	5	5	0
cDNA FLJ58398, highly similar to A-kinase anchor protein 8	B4DJ74	65 kDa	0	3	2	5	0
Pre-mRNA-splicing factor ATP-dependent RNA helicase PRP16	Q92620	141 kDa	5	0	0	5	0
Splicing factor 3B subunit 3	Q15393	136 kDa	5	0	0	5	0
AKAP8 protein	Q8NE02	76 kDa	0	5	0	5	0
U2 snRNP-associated SURP motif-containing protein	O15042	118 kDa	5	0	0	5	0
Condensin complex subunit 1	Q15021	157 kDa	5	0	0	5	0
Voltage-dependent calcium channel subunit alpha-2/delta-1	P54289	125 kDa	5	0	0	5	0
U3 small nucleolar RNA-associated protein 18 homolog	Q9Y5J1	62 kDa	0	0	5	5	0
SF3A2 protein (Fragment)	Q05DF2	51 kDa	0	0	5	5	0
Keratin, type II cytoskeletal 5	P13647	62 kDa	4	0	0	4	0
Ubiquitin-associated protein 2-like	Q14157	115 kDa	4	0	0	4	0
Double-stranded RNA-binding protein Staufen homolog 1	O95793	63 kDa	0	0	4	4	0
Fragile X mental retardation 1	G3V0J0	67 kDa	0	4	0	4	0
Kinectin	Q86UP2	156 kDa	4	0	0	4	0
THO complex subunit 2	Q8NI27	183 kDa	4	0	0	4	0
5'-3' exoribonuclease 2	Q9H0D6	109 kDa	0	4	0	4	0
Protein angel homolog 1	Q9UNK9	75 kDa	0	4	0	4	0
UNC84B protein	Q2T9F7	80 kDa	0	4	0	4	0
Neuropathy target esterase	Q8IY17	150 kDa	4	0	0	4	0
Uveal autoantigen with coiled-coil domains and ankyrin repeats	Q9BZF9	163 kDa	4	0	0	4	0
Apoptosis-inducing factor 1, mitochondrial	O95831	67 kDa	0	0	4	4	0
Calcium/calmodulin-dependent protein kinase type II subunit gamma	Q13555	63 kDa	0	0	4	4	0
Acid sphingomyelinase-like phosphodiesterase 3b	Q92485	51 kDa	0	0	4	4	0
Regulator of nonsense transcripts 3B	Q9BZI7	58 kDa	0	0	4	4	0
Heterogeneous nuclear ribonucleoprotein D0	Q14103	38 kDa	0	0	3	3	0
DNA-dependent protein kinase catalytic subunit	P78527	469 kDa	3	0	0	3	0
Putative uncharacterized protein DKFZp686A13234 (Fragment)	Q6MZS5	68 kDa	0	2	1	3	0
Dynactin subunit 1	Q14203	142 kDa	3	0	0	3	0
Ataxin-2	Q99700	140 kDa	3	0	0	3	0
60S ribosomal protein L6	Q9HBB3	33 kDa	0	3	0	3	0
Guanine nucleotide-binding protein-like 3-like protein	Q9NVN8	66 kDa	0	3	0	3	0
Coiled-coil domain-containing protein 138	Q96M89	76 kDa	0	3	0	3	0
DNA-directed RNA polymerase III subunit RPC1	O14802	156 kDa	3	0	0	3	0
Fanconi anemia group D2 protein	Q9BXW9	166 kDa	3	0	0	3	0
AP-3 complex subunit delta-1	O14617	130 kDa	3	0	0	3	0
Junction plakoglobin	F5GWP8	66 kDa	0	3	0	3	0
T-complex protein 1 subunit epsilon	P48643	60 kDa	0	0	3	3	0
Tubulin beta-4B chain	P68371	50 kDa	0	0	3	3	0
Protein angel homolog 2	Q5VTE6	62 kDa	0	0	3	3	0
Nucleolin	P19338	77 kDa	0	2	0	2	0
Guanine nucleotide-binding protein-like 3	Q9BVP2	62 kDa	0	0	2	2	0
Bcl-2-associated transcription factor 1	Q9NYF8	106 kDa	2	0	0	2	0
Rac GTPase-activating protein 1	Q9H0H5	71 kDa	0	2	0	2	0
Coilin	P38432	63 kDa	0	2	0	2	0
Histone deacetylase	Q6IT96	55 kDa	0	0	2	2	0
IK cytokine, down-regulator of HLA II	Q95HA6	66 kDa	0	2	0	2	0
Extracellular sulfatase Sulf-2	Q8IWU5	100 kDa	0	2	0	2	0
DNA repair protein RAD50	Q92878	154 kDa	2	0	0	2	0
CWF19-like protein 1	Q69YN2	61 kDa	0	0	2	2	0
Melanoma-associated antigen D2	Q9UNF1	65 kDa	0	2	0	2	0
Zinc finger protein 768	Q9H5H4	60 kDa	0	2	0	2	0
ATPase family AAA domain-containing protein 3B	Q5T9A4	73 kDa	0	0	2	2	0
Protein C16orf88	Q1ED39	52 kDa	0	0	2	2	0
Cell division control protein 45 homolog	O75419	66 kDa	0	0	2	2	0
U4/U6.U5 tri-snRNP-associated protein 2	Q53GS9	65 kDa	0	0	2	2	0
Versican core protein	P13611	373 kDa	2	0	0	2	0
Junction plakoglobin	P14923	82 kDa	0	2	0	2	0
Protein FAM98A	Q8NCA5	55 kDa	0	0	2	2	0
Myelin expression factor 2	Q9P2K5	64 kDa	0	2	0	2	0
ATP-dependent RNA helicase DHX29	Q7Z478	155 kDa	1	0	0	1	0
Double-stranded RNA-binding protein Staufen homolog 2	Q9NUL3	63 kDa	0	0	1	1	0
Golgi apparatus protein 1	Q92896	135 kDa	1	0	0	1	0
RNA-binding protein 6	P78332	129 kDa	1	0	0	1	0
Putative protein FAM90A7	A6NKC0	50 kDa	1	0	0	1	0
X-ray repair cross-complementing protein 6	P12956	70 kDa	0	1	0	1	0
Probable ATP-dependent RNA helicase DHX36	Q9H2U1	115 kDa	0	1	0	1	0
Amyloid beta A4 precursor protein-binding family B member 1	O00213	77 kDa	0	0	1	1	0
Complement decay-accelerating factor	P08174	41 kDa	0	1	0	1	0
Signal recognition particle 72 kDa protein	O76094	75 kDa	0	1	0	1	0
Melanoma-associated antigen D1	Q9Y5V3	86 kDa	0	1	0	1	0
