# Supplementary figures and images for: The Neuroprotective Marine Compound Psammaplysene A Binds the RNA-Binding Protein HNRNPK
Source: MDPI journal article supplement (doi:10.3390/md15080246), 2017-08-07

# Supplemental figure 1.

cyto

nuclear

IB: hnRNP K

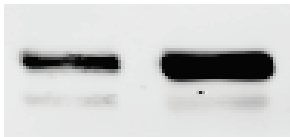

IB: Actin

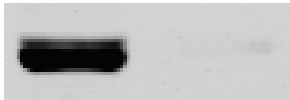

Supplement: s1 [file s1]
